# Supplementary material for: Pain mechanisms in complex regional pain syndrome: a systematic review and meta-analysis of quantitative sensory testing outcomes
Source: PubMed Central journal article supplement (PMC9806919; doi:10.1186/s13018-022-03461-2), 2023-01-02

| Study or Subgroup                                                                                         | CRPS |      |            | Control |     |            | Weight        | Std. Mean Difference |                     | Year |
|-----------------------------------------------------------------------------------------------------------|------|------|------------|---------|-----|------------|---------------|----------------------|---------------------|------|
|                                                                                                           | Mean | SD   | Total      | Mean    | SD  | Total      |               | IV, Random, 95% CI   | IV, Random, 95% CI  |      |
| Thimineur 1998                                                                                            | 18   | 5.7  | 140        | 9.5     | 7.5 | 26         | 20.1%         | 1.41                 | [0.96, 1.85]        | 1998 |
| Thimineur 1998                                                                                            | 12.2 | 10   | 140        | 3.9     | 2   | 26         | 20.6%         | 0.89                 | [0.46, 1.32]        | 1998 |
| Huge 2008                                                                                                 | 0.9  | 0.3  | 61         | 0.52    | 0.3 | 56         | 21.7%         | 1.26                 | [0.86, 1.66]        | 2008 |
| Gierthmühlen 2012                                                                                         | 0.7  | 0.3  | 298        | 0.5     | 0.2 | 32         | 22.7%         | 0.68                 | [0.31, 1.05]        | 2012 |
| Kolb 2012                                                                                                 | 6.9  | 10.2 | 20         | 3.9     | 2.1 | 20         | 14.9%         | 0.40                 | [-0.23, 1.03]       | 2012 |
| <b>Total (95% CI)</b>                                                                                     |      |      | <b>659</b> |         |     | <b>160</b> | <b>100.0%</b> | <b>0.96</b>          | <b>[0.62, 1.29]</b> |      |
| Heterogeneity: Tau <sup>2</sup> = 0.09; Chi <sup>2</sup> = 11.36, df = 4 (P = 0.02); I <sup>2</sup> = 65% |      |      |            |         |     |            |               |                      |                     |      |
| Test for overall effect: Z = 5.62 (P < 0.00001)                                                           |      |      |            |         |     |            |               |                      |                     |      |

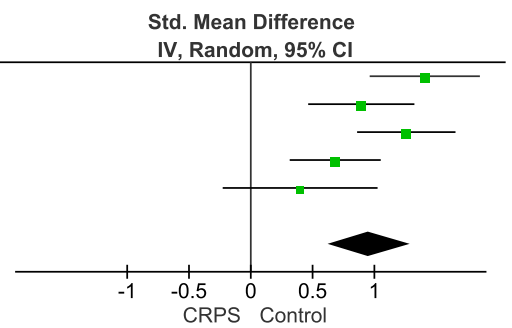

Supplement: 13018_2022_3461_MOESM9_ESM.pdf [file 13018_2022_3461_MOESM9_ESM.pdf]
