# Supplementary material for: Pain mechanisms in complex regional pain syndrome: a systematic review and meta-analysis of quantitative sensory testing outcomes
Source: PubMed Central journal article supplement (PMC9806919; doi:10.1186/s13018-022-03461-2), 2023-01-02

| Study or Subgroup     | CRPS |      | Control    |      |      | Weight     | Std. Mean Difference |                             | Year | Std. Mean Difference |  |
|-----------------------|------|------|------------|------|------|------------|----------------------|-----------------------------|------|----------------------|--|
|                       | Mean | SD   | Total      | Mean | SD   |            | Total                | IV, Random, 95% CI          |      | IV, Random, 95% CI   |  |
| Kemler 2000           | 30.9 | 4.1  | 33         | 31.3 | 1.4  | 50         | 12.8%                | -0.14 [-0.58, 0.30]         | 2000 |                      |  |
| Kemler 2000           | 28.8 | 21.8 | 20         | 30.9 | 5.1  | 50         | 11.3%                | -0.17 [-0.69, 0.35]         | 2000 |                      |  |
| Huge 2008             | 28.4 | 2.4  | 34         | 30.5 | 1    | 56         | 12.3%                | -1.25 [-1.71, -0.78]        | 2008 |                      |  |
| Munts 2011            | 28.7 | 3.4  | 44         | 31.5 | 0.6  | 35         | 12.1%                | -1.08 [-1.55, -0.60]        | 2011 |                      |  |
| Kolb 2012             | 26.7 | 7    | 20         | 29.5 | 1.4  | 20         | 9.4%                 | -0.54 [-1.18, 0.09]         | 2012 |                      |  |
| Gierthmühlen 2012     | 31.6 | 0.35 | 298        | 31.8 | 0.23 | 32         | 14.3%                | -0.59 [-0.95, -0.22]        | 2012 |                      |  |
| Rooijen 2013          | 29.7 | 1.7  | 17         | 30.8 | 1    | 42         | 10.2%                | -0.88 [-1.46, -0.29]        | 2013 |                      |  |
| Rooijen 2013          | 29.4 | 2.25 | 31         | 30.8 | 1    | 42         | 12.0%                | -0.84 [-1.33, -0.36]        | 2013 |                      |  |
| Rasmussen 2018        | 29.6 | 2.1  | 8          | 30   | 1.1  | 8          | 5.5%                 | -0.23 [-1.21, 0.76]         | 2018 |                      |  |
| <b>Total (95% CI)</b> |      |      | <b>505</b> |      |      | <b>335</b> | <b>100.0%</b>        | <b>-0.66 [-0.93, -0.39]</b> |      |                      |  |

Heterogeneity: Tau<sup>2</sup> = 0.10; Chi<sup>2</sup> = 19.95, df = 8 (P = 0.01); I<sup>2</sup> = 60%  
 Test for overall effect: Z = 4.76 (P < 0.00001)

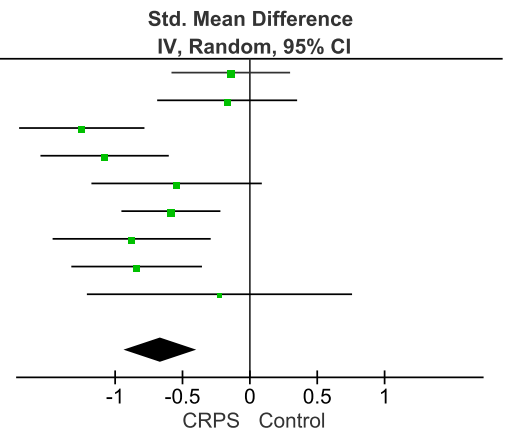

Supplement: 13018_2022_3461_MOESM1_ESM.pdf [file 13018_2022_3461_MOESM1_ESM.pdf]
