# Supplementary material for: Pain mechanisms in complex regional pain syndrome: a systematic review and meta-analysis of quantitative sensory testing outcomes
Source: PubMed Central journal article supplement (PMC9806919; doi:10.1186/s13018-022-03461-2), 2023-01-02

| Study or Subgroup     | CRPS |      |            | Control |      |            | Weight        | Std. Mean Difference |                       | Year |
|-----------------------|------|------|------------|---------|------|------------|---------------|----------------------|-----------------------|------|
|                       | Mean | SD   | Total      | Mean    | SD   | Total      |               | IV, Random, 95% CI   | IV, Random, 95% CI    |      |
| Kemler 2000           | 31.3 | 1.76 | 33         | 31.3    | 1.44 | 50         | 11.9%         | 0.00                 | [-0.44, 0.44]         | 2000 |
| Kemler 2000           | 30   | 12.2 | 20         | 30.9    | 5.1  | 50         | 10.6%         | -0.11                | [-0.63, 0.40]         | 2000 |
| Huge 2008             | 29.2 | 1.6  | 34         | 30.5    | 0.9  | 56         | 11.7%         | -1.06                | [-1.52, -0.61]        | 2008 |
| Munts 2011            | 31.1 | 1    | 7          | 31.5    | 0.6  | 35         | 6.6%          | -0.58                | [-1.40, 0.24]         | 2011 |
| Kolb 2012             | 29.5 | 1.7  | 20         | 29.5    | 1.4  | 20         | 9.1%          | 0.00                 | [-0.62, 0.62]         | 2012 |
| Rooijen 2013          | 30.4 | 1.35 | 21         | 30.6    | 0.7  | 42         | 10.5%         | -0.21                | [-0.73, 0.32]         | 2013 |
| Rooijen 2013          | 28.8 | 2.4  | 30         | 28.2    | 2.4  | 42         | 11.4%         | 0.25                 | [-0.22, 0.72]         | 2013 |
| Rooijen 2013          | 30.6 | 0.5  | 48         | 31      | 0.8  | 42         | 12.2%         | -0.60                | [-1.03, -0.18]        | 2013 |
| Rooijen 2013          | 27.4 | 4.6  | 24         | 28.9    | 2.5  | 42         | 10.8%         | -0.44                | [-0.94, 0.07]         | 2013 |
| Rasmussen 2018        | 28.5 | 3.8  | 8          | 30      | 1.1  | 8          | 5.1%          | -0.51                | [-1.51, 0.49]         | 2018 |
| <b>Total (95% CI)</b> |      |      | <b>245</b> |         |      | <b>387</b> | <b>100.0%</b> | <b>-0.32</b>         | <b>[-0.58, -0.05]</b> |      |

Heterogeneity: Tau<sup>2</sup> = 0.11; Chi<sup>2</sup> = 22.16, df = 9 (P = 0.008); I<sup>2</sup> = 59%

Test for overall effect: Z = 2.30 (P = 0.02)

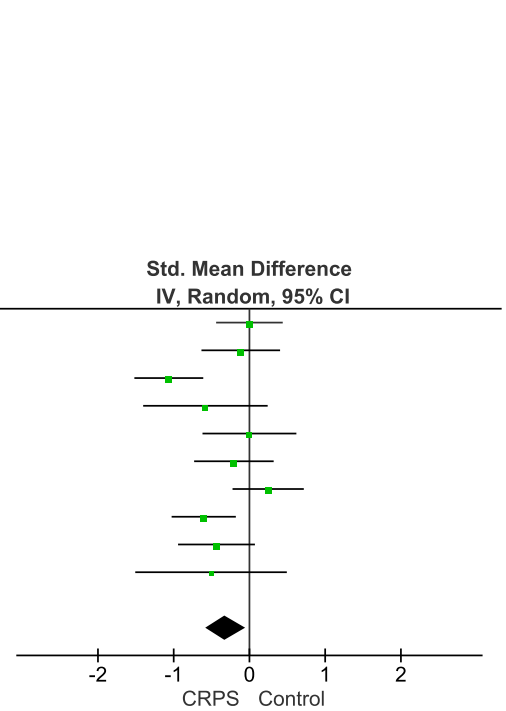

Supplement: 13018_2022_3461_MOESM3_ESM.pdf [file 13018_2022_3461_MOESM3_ESM.pdf]
