# Supplementary material for: Pain mechanisms in complex regional pain syndrome: a systematic review and meta-analysis of quantitative sensory testing outcomes
Source: PubMed Central journal article supplement (PMC9806919; doi:10.1186/s13018-022-03461-2), 2023-01-02
Supplement: 13018_2022_3461_MOESM5_ESM.pdf [file 13018_2022_3461_MOESM5_ESM.pdf]

| Study or Subgroup     | CRPS  |      |            | Control |      |            | Weight        | Std. Mean Difference |                     | Year |
|-----------------------|-------|------|------------|---------|------|------------|---------------|----------------------|---------------------|------|
|                       | Mean  | SD   | Total      | Mean    | SD   | Total      |               | IV, Random, 95% CI   | 95% CI              |      |
| Kemler 2000           | 33.1  | 5.7  | 33         | 32.5    | 2.89 | 50         | 12.8%         | 0.14                 | [-0.30, 0.58]       | 2000 |
| Kemler 2000           | 36.5  | 19   | 20         | 35.4    | 20.2 | 50         | 11.2%         | 0.05                 | [-0.46, 0.57]       | 2000 |
| Huge 2008             | 37.2  | 4.1  | 34         | 34.3    | 1.5  | 56         | 12.5%         | 1.04                 | [0.58, 1.49]        | 2008 |
| Munts 2011            | 34.7  | 3.7  | 44         | 32.5    | 0.3  | 35         | 12.4%         | 0.79                 | [0.32, 1.25]        | 2011 |
| Kolb 2012             | 35.7  | 4    | 20         | 35.5    | 2.6  | 20         | 9.4%          | 0.06                 | [-0.56, 0.68]       | 2012 |
| Gierthmühlen 2012     | 32.49 | 0.32 | 298        | 32.35   | 0.2  | 32         | 14.5%         | 0.45                 | [0.08, 0.82]        | 2012 |
| Rooijen 2013 (1)      | 38.3  | 6.4  | 17         | 35      | 2    | 42         | 10.0%         | 0.86                 | [0.27, 1.44]        | 2013 |
| Rooijen 2013          | 38.2  | 6.84 | 31         | 35      | 2    | 42         | 12.0%         | 0.67                 | [0.20, 1.15]        | 2013 |
| Rasmussen 2018        | 36.3  | 1.7  | 8          | 37      | 3.4  | 8          | 5.1%          | -0.25                | [-1.23, 0.74]       | 2018 |
| <b>Total (95% CI)</b> |       |      | <b>505</b> |         |      | <b>335</b> | <b>100.0%</b> | <b>0.48</b>          | <b>[0.22, 0.73]</b> |      |

Heterogeneity: Tau<sup>2</sup> = 0.08; Chi<sup>2</sup> = 18.41, df = 8 (P = 0.02); I<sup>2</sup> = 57%  
Test for overall effect: Z = 3.62 (P = 0.0003)

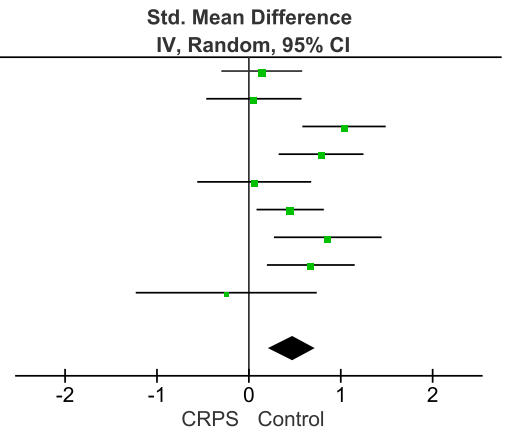

Footnotes

(1) 6
