# Supplementary material for: Pain mechanisms in complex regional pain syndrome: a systematic review and meta-analysis of quantitative sensory testing outcomes
Source: PubMed Central journal article supplement (PMC9806919; doi:10.1186/s13018-022-03461-2), 2023-01-02

| Study or Subgroup     | CRPS  |      |            | Control |      |            | Weight        | Std. Mean Difference |                     | Year |
|-----------------------|-------|------|------------|---------|------|------------|---------------|----------------------|---------------------|------|
|                       | Mean  | SD   | Total      | Mean    | SD   | Total      |               | IV, Random, 95% CI   | IV, Random, 95% CI  |      |
| Kemler 2000           | 32.7  | 2.93 | 33         | 32.5    | 2.89 | 50         | 12.3%         | 0.07                 | [-0.37, 0.51]       | 2000 |
| Kemler 2000           | 35.7  | 17.3 | 20         | 35.4    | 20.2 | 50         | 10.6%         | 0.02                 | [-0.50, 0.53]       | 2000 |
| Huge 2008             | 36.2  | 3    | 34         | 34.3    | 1.5  | 56         | 12.2%         | 0.86                 | [0.42, 1.31]        | 2008 |
| Munts 2011            | 32.8  | 1.1  | 7          | 32.5    | 0.3  | 35         | 6.2%          | 0.58                 | [-0.24, 1.40]       | 2011 |
| Kolb 2012             | 34.8  | 3.4  | 20         | 35.5    | 2.6  | 20         | 8.8%          | -0.23                | [-0.85, 0.40]       | 2012 |
| Rooijen 2013          | 36    | 3.34 | 21         | 34.7    | 1.92 | 42         | 10.4%         | 0.52                 | [-0.01, 1.05]       | 2013 |
| Rooijen 2013          | 38.56 | 4.67 | 30         | 36.9    | 3.15 | 42         | 11.5%         | 0.43                 | [-0.05, 0.90]       | 2013 |
| Rooijen 2013          | 35.3  | 1.6  | 48         | 34.3    | 1.5  | 42         | 12.6%         | 0.64                 | [0.21, 1.06]        | 2013 |
| Rooijen 2013          | 38.5  | 5.4  | 24         | 37.6    | 3.37 | 42         | 10.9%         | 0.21                 | [-0.29, 0.71]       | 2013 |
| Rasmussen 2018        | 35    | 1.6  | 8          | 37      | 3.4  | 8          | 4.5%          | -0.71                | [-1.73, 0.31]       | 2018 |
| <b>Total (95% CI)</b> |       |      | <b>245</b> |         |      | <b>387</b> | <b>100.0%</b> | <b>0.31</b>          | <b>[0.06, 0.55]</b> |      |

Heterogeneity: Tau<sup>2</sup> = 0.08; Chi<sup>2</sup> = 18.54, df = 9 (P = 0.03); I<sup>2</sup> = 51%

Test for overall effect: Z = 2.44 (P = 0.01)

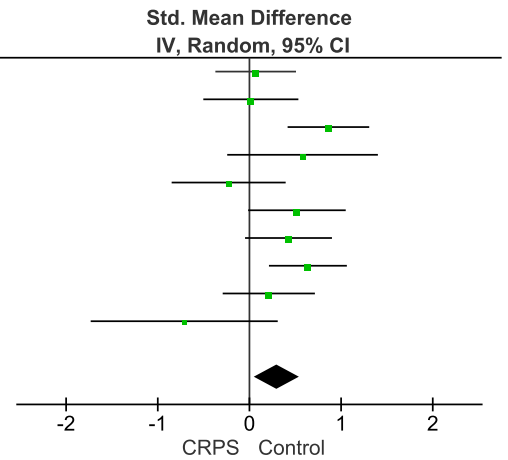

Supplement: 13018_2022_3461_MOESM7_ESM.pdf [file 13018_2022_3461_MOESM7_ESM.pdf]
