# Supplementary material for: Pain mechanisms in complex regional pain syndrome: a systematic review and meta-analysis of quantitative sensory testing outcomes
Source: PubMed Central journal article supplement (PMC9806919; doi:10.1186/s13018-022-03461-2), 2023-01-02

| Study or Subgroup     | CRPS |     |            | Control |     |            | Weight        | Std. Mean Difference |                     | Year |
|-----------------------|------|-----|------------|---------|-----|------------|---------------|----------------------|---------------------|------|
|                       | Mean | SD  | Total      | Mean    | SD  | Total      |               | IV, Random, 95% CI   | IV, Random, 95% CI  |      |
| Thimineur 1998        | 5.5  | 6.5 | 140        | 3.8     | 5.6 | 26         | 13.4%         | 0.27                 | [-0.15, 0.69]       | 1998 |
| Thimineur 1998        | 13   | 9.2 | 140        | 7       | 3   | 26         | 13.2%         | 0.70                 | [0.27, 1.12]        | 1998 |
| Thimineur 1998        | 8.2  | 8   | 140        | 3.7     | 2.6 | 26         | 13.2%         | 0.60                 | [0.18, 1.03]        | 1998 |
| Thimineur 1998        | 6.5  | 7.2 | 140        | 1.8     | 1.4 | 26         | 13.2%         | 0.70                 | [0.28, 1.13]        | 1998 |
| Thimineur 1998        | 4    | 5.5 | 140        | 1.7     | 1.3 | 26         | 13.3%         | 0.45                 | [0.03, 0.87]        | 1998 |
| Thimineur 1998        | 11.8 | 9.5 | 140        | 3.2     | 2.7 | 26         | 13.0%         | 0.97                 | [0.54, 1.40]        | 1998 |
| Huge 2008             | 0.8  | 0.2 | 34         | 0.52    | 0.3 | 56         | 12.3%         | 1.04                 | [0.59, 1.49]        | 2008 |
| Kolb 2012             | 3.9  | 3.7 | 20         | 3.9     | 2.1 | 20         | 8.4%          | 0.00                 | [-0.62, 0.62]       | 2012 |
| <b>Total (95% CI)</b> |      |     | <b>894</b> |         |     | <b>232</b> | <b>100.0%</b> | <b>0.61</b>          | <b>[0.40, 0.83]</b> |      |

Heterogeneity: Tau<sup>2</sup> = 0.05; Chi<sup>2</sup> = 13.34, df = 7 (P = 0.06); I<sup>2</sup> = 48%  
 Test for overall effect: Z = 5.53 (P < 0.00001)

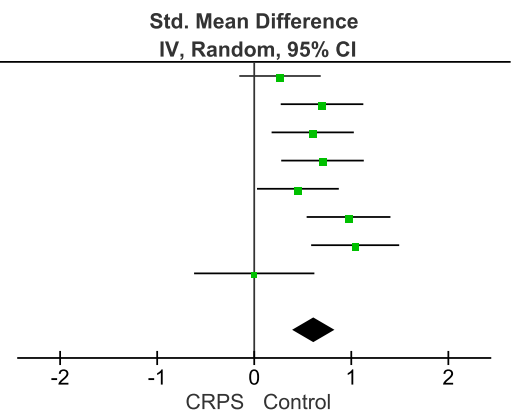

Supplement: 13018_2022_3461_MOESM10_ESM.pdf [file 13018_2022_3461_MOESM10_ESM.pdf]
