# Supplementary material for: Pain mechanisms in complex regional pain syndrome: a systematic review and meta-analysis of quantitative sensory testing outcomes
Source: PubMed Central journal article supplement (PMC9806919; doi:10.1186/s13018-022-03461-2), 2023-01-02

| Study or Subgroup     | CRPS |       |            | Control |      |            | Weight        | Std. Mean Difference |                     | Year |
|-----------------------|------|-------|------------|---------|------|------------|---------------|----------------------|---------------------|------|
|                       | Mean | SD    | Total      | Mean    | SD   | Total      |               | IV, Random, 95% CI   | IV, Random, 95% CI  |      |
| Thimineur 1998        | 3.9  | 9     | 140        | 2.9     | 0.3  | 26         | 19.7%         | 0.12                 | [-0.30, 0.54]       | 1998 |
| Kemler 2000           | 7.9  | 255   | 33         | 0.07    | 0.27 | 50         | 17.9%         | 0.05                 | [-0.39, 0.49]       | 2000 |
| Kemler 2000           | 4.5  | 33.88 | 20         | 0.34    | 1.56 | 50         | 12.8%         | 0.23                 | [-0.29, 0.75]       | 2000 |
| Seifert 2009          | 28   | 30.9  | 27         | 8.14    | 5.95 | 14         | 7.7%          | 0.76                 | [0.10, 1.43]        | 2009 |
| Gierthmühlen 2012     | 0.32 | 0.68  | 257        | 0.15    | 0.4  | 32         | 25.5%         | 0.26                 | [-0.11, 0.63]       | 2012 |
| Palmer 2019           | 0.14 | 0.7   | 36         | 0.06    | 0.09 | 37         | 16.4%         | 0.16                 | [-0.30, 0.62]       | 2019 |
| <b>Total (95% CI)</b> |      |       | <b>513</b> |         |      | <b>209</b> | <b>100.0%</b> | <b>0.21</b>          | <b>[0.03, 0.40]</b> |      |

Heterogeneity: Tau<sup>2</sup> = 0.00; Chi<sup>2</sup> = 3.46, df = 5 (P = 0.63); I<sup>2</sup> = 0%  
 Test for overall effect: Z = 2.24 (P = 0.02)

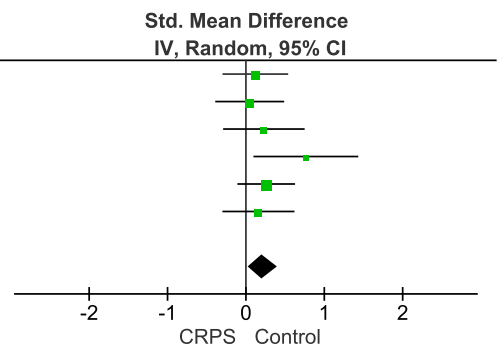

Supplement: 13018_2022_3461_MOESM11_ESM.pdf [file 13018_2022_3461_MOESM11_ESM.pdf]
