# Supplementary material for: Pain mechanisms in complex regional pain syndrome: a systematic review and meta-analysis of quantitative sensory testing outcomes
Source: PubMed Central journal article supplement (PMC9806919; doi:10.1186/s13018-022-03461-2), 2023-01-02

| Study or Subgroup     | CRPS |      |            | Control |      |            | Weight        | Std. Mean Difference |                     | Year |
|-----------------------|------|------|------------|---------|------|------------|---------------|----------------------|---------------------|------|
|                       | Mean | SD   | Total      | Mean    | SD   | Total      |               | IV, Random, 95% CI   | IV, Random, 95% CI  |      |
| Thimineur 1998        | 3.3  | 0.75 | 140        | 2.8     | 0.3  | 26         | 21.1%         | 0.71                 | [0.29, 1.14]        | 1998 |
| Kemler 2000           | 0.98 | 3.87 | 20         | 0.34    | 1.56 | 50         | 14.2%         | 0.26                 | [-0.26, 0.78]       | 2000 |
| Kemler 2000           | 0.14 | 0.53 | 33         | 0.07    | 0.27 | 50         | 19.7%         | 0.18                 | [-0.26, 0.62]       | 2000 |
| Seifert 2009          | 15.6 | 16   | 27         | 8.14    | 5.95 | 14         | 8.9%          | 0.54                 | [-0.12, 1.20]       | 2009 |
| Palmer 2019           | 0.12 | 0.31 | 36         | 0.06    | 0.09 | 37         | 18.0%         | 0.26                 | [-0.20, 0.72]       | 2019 |
| Palmer 2019           | 0.1  | 0.7  | 36         | 0.05    | 0.1  | 37         | 18.1%         | 0.10                 | [-0.36, 0.56]       | 2019 |
| <b>Total (95% CI)</b> |      |      | <b>292</b> |         |      | <b>214</b> | <b>100.0%</b> | <b>0.33</b>          | <b>[0.14, 0.53]</b> |      |

Heterogeneity: Tau<sup>2</sup> = 0.00; Chi<sup>2</sup> = 5.06, df = 5 (P = 0.41); I<sup>2</sup> = 1%

Test for overall effect: Z = 3.33 (P = 0.0009)

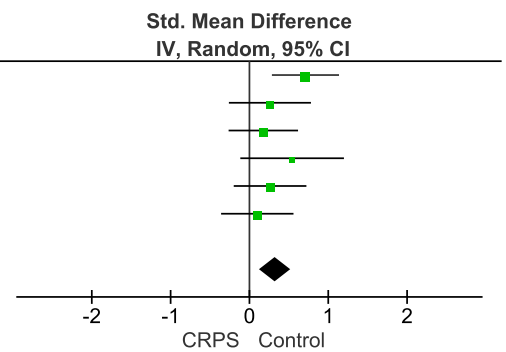

Supplement: 13018_2022_3461_MOESM12_ESM.pdf [file 13018_2022_3461_MOESM12_ESM.pdf]
