# Supplementary material for: Pain mechanisms in complex regional pain syndrome: a systematic review and meta-analysis of quantitative sensory testing outcomes
Source: PubMed Central journal article supplement (PMC9806919; doi:10.1186/s13018-022-03461-2), 2023-01-02

| Study or Subgroup     | CRPS  |      |            | Control |      |            | Weight        | Std. Mean Difference |                     | Year | Std. Mean Difference |      |
|-----------------------|-------|------|------------|---------|------|------------|---------------|----------------------|---------------------|------|----------------------|------|
|                       | Mean  | SD   | Total      | Mean    | SD   | Total      |               | IV, Random, 95% CI   | Year                |      | IV, Random, 95% CI   | Year |
| Kolb 2012             | -7.59 | 8    | 20         | -7.62   | 0.54 | 20         | 15.3%         | 0.01                 | [-0.61, 0.62]       | 2012 |                      |      |
| Gierthmühlen 2012     | -7.2  | 1.1  | 297        | -7.78   | 0.36 | 32         | 30.3%         | 0.55                 | [0.18, 0.92]        | 2012 |                      |      |
| Rooijen 2013          | 0.53  | 0.68 | 17         | 0.26    | 0.18 | 42         | 17.0%         | 0.68                 | [0.10, 1.26]        | 2013 |                      |      |
| Rooijen 2013          | 2.12  | 3.96 | 31         | 0.26    | 0.18 | 42         | 22.1%         | 0.71                 | [0.23, 1.19]        | 2013 |                      |      |
| Bank 2013             | 0.5   | 0.35 | 20         | 0.49    | 0.34 | 20         | 15.3%         | 0.03                 | [-0.59, 0.65]       | 2013 |                      |      |
| <b>Total (95% CI)</b> |       |      | <b>385</b> |         |      | <b>156</b> | <b>100.0%</b> | <b>0.45</b>          | <b>[0.17, 0.72]</b> |      |                      |      |

Heterogeneity: Tau<sup>2</sup> = 0.03; Chi<sup>2</sup> = 5.80, df = 4 (P = 0.21); I<sup>2</sup> = 31%  
Test for overall effect: Z = 3.15 (P = 0.002)

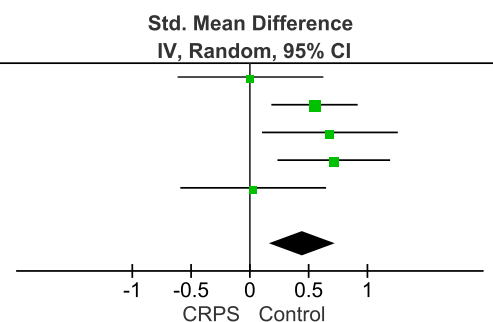

Supplement: 13018_2022_3461_MOESM13_ESM.pdf [file 13018_2022_3461_MOESM13_ESM.pdf]
