# Supplementary material for: Pain mechanisms in complex regional pain syndrome: a systematic review and meta-analysis of quantitative sensory testing outcomes
Source: PubMed Central journal article supplement (PMC9806919; doi:10.1186/s13018-022-03461-2), 2023-01-02

| Study or Subgroup     | CRPS  |       |            | Control |      |            | Weight        | Std. Mean Difference |                     | Year |
|-----------------------|-------|-------|------------|---------|------|------------|---------------|----------------------|---------------------|------|
|                       | Mean  | SD    | Total      | Mean    | SD   | Total      |               | IV, Random, 95% CI   | IV, Random, 95% CI  |      |
| Kolb 2012             | -7.59 | 8.5   | 20         | -7.62   | 0.54 | 20         | 11.7%         | 0.00                 | [-0.61, 0.62]       | 2012 |
| Bank 2013             | 0.43  | 0.39  | 20         | 0.49    | 0.34 | 20         | 11.7%         | -0.16                | [-0.78, 0.46]       | 2013 |
| Rooijen 2013          | 0.56  | 0.715 | 21         | 0.3     | 0.12 | 42         | 15.5%         | 0.61                 | [0.07, 1.15]        | 2013 |
| Rooijen 2013          | 4.8   | 7.9   | 30         | 3.1     | 4.7  | 42         | 19.7%         | 0.27                 | [-0.20, 0.74]       | 2013 |
| Rooijen 2013          | 1.79  | 1.6   | 48         | 1       | 1.4  | 42         | 24.1%         | 0.52                 | [0.10, 0.94]        | 2013 |
| Rooijen 2013          | 5.23  | 7.95  | 24         | 3.4     | 5.3  | 42         | 17.3%         | 0.28                 | [-0.22, 0.79]       | 2013 |
| <b>Total (95% CI)</b> |       |       | <b>163</b> |         |      | <b>208</b> | <b>100.0%</b> | <b>0.30</b>          | <b>[0.09, 0.52]</b> |      |

Heterogeneity: Tau<sup>2</sup> = 0.00; Chi<sup>2</sup> = 5.32, df = 5 (P = 0.38); I<sup>2</sup> = 6%  
 Test for overall effect: Z = 2.74 (P = 0.006)

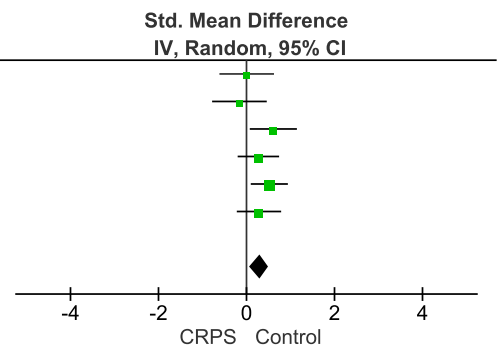

Supplement: 13018_2022_3461_MOESM14_ESM.pdf [file 13018_2022_3461_MOESM14_ESM.pdf]
