# Supplementary material for: Pain mechanisms in complex regional pain syndrome: a systematic review and meta-analysis of quantitative sensory testing outcomes
Source: PubMed Central journal article supplement (PMC9806919; doi:10.1186/s13018-022-03461-2), 2023-01-02

| Study or Subgroup     | CRPS  |       |            | Control |       |            | Weight        | Std. Mean Difference |                     | Year |
|-----------------------|-------|-------|------------|---------|-------|------------|---------------|----------------------|---------------------|------|
|                       | Mean  | SD    | Total      | Mean    | SD    | Total      |               | IV, Random, 95% CI   | IV, Random, 95% CI  |      |
| Kemler 2000           | 10.5  | 39.13 | 20         | 3.4     | 27.24 | 50         | 10.2%         | 0.23                 | [-0.29, 0.75]       | 2000 |
| Kemler 2000           | 10.6  | 38.24 | 33         | 5.4     | 27.78 | 50         | 13.9%         | 0.16                 | [-0.28, 0.60]       | 2000 |
| Huge 2008             | 13.8  | 9.3   | 34         | 9.83    | 7.6   | 56         | 14.4%         | 0.48                 | [0.04, 0.91]        | 2008 |
| Kolb 2012             | 9.7   | 7.5   | 20         | 11.9    | 9.4   | 20         | 7.3%          | -0.25                | [-0.88, 0.37]       | 2012 |
| Rooijen 2013          | 18.46 | 16.14 | 21         | 11.06   | 13.59 | 42         | 9.8%          | 0.50                 | [-0.03, 1.04]       | 2013 |
| Rooijen 2013          | 17.63 | 12.84 | 30         | 9.13    | 16    | 42         | 11.9%         | 0.57                 | [0.09, 1.05]        | 2013 |
| Rooijen 2013          | 19.67 | 18.3  | 30         | 13.6    | 17.6  | 42         | 12.2%         | 0.34                 | [-0.14, 0.81]       | 2013 |
| Rooijen 2013          | 13.9  | 19.6  | 24         | 10.03   | 15.3  | 42         | 10.9%         | 0.23                 | [-0.28, 0.73]       | 2013 |
| Terkelsen 2014        | 17.2  | 6.5   | 20         | 12.3    | 4.2   | 20         | 6.7%          | 0.88                 | [0.23, 1.53]        | 2014 |
| Rasmussen 2018        | 20    | 17.2  | 8          | 6.5     | 12.3  | 8          | 2.7%          | 0.85                 | [-0.18, 1.89]       | 2018 |
| <b>Total (95% CI)</b> |       |       | <b>240</b> |         |       | <b>372</b> | <b>100.0%</b> | <b>0.36</b>          | <b>[0.19, 0.53]</b> |      |

Heterogeneity: Tau<sup>2</sup> = 0.01; Chi<sup>2</sup> = 9.65, df = 9 (P = 0.38); I<sup>2</sup> = 7%

Test for overall effect: Z = 4.09 (P < 0.0001)

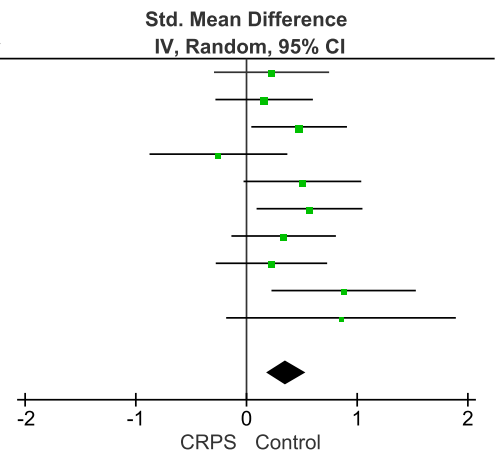

Supplement: 13018_2022_3461_MOESM17_ESM.pdf [file 13018_2022_3461_MOESM17_ESM.pdf]
