# Supplementary material for: Pain mechanisms in complex regional pain syndrome: a systematic review and meta-analysis of quantitative sensory testing outcomes
Source: PubMed Central journal article supplement (PMC9806919; doi:10.1186/s13018-022-03461-2), 2023-01-02

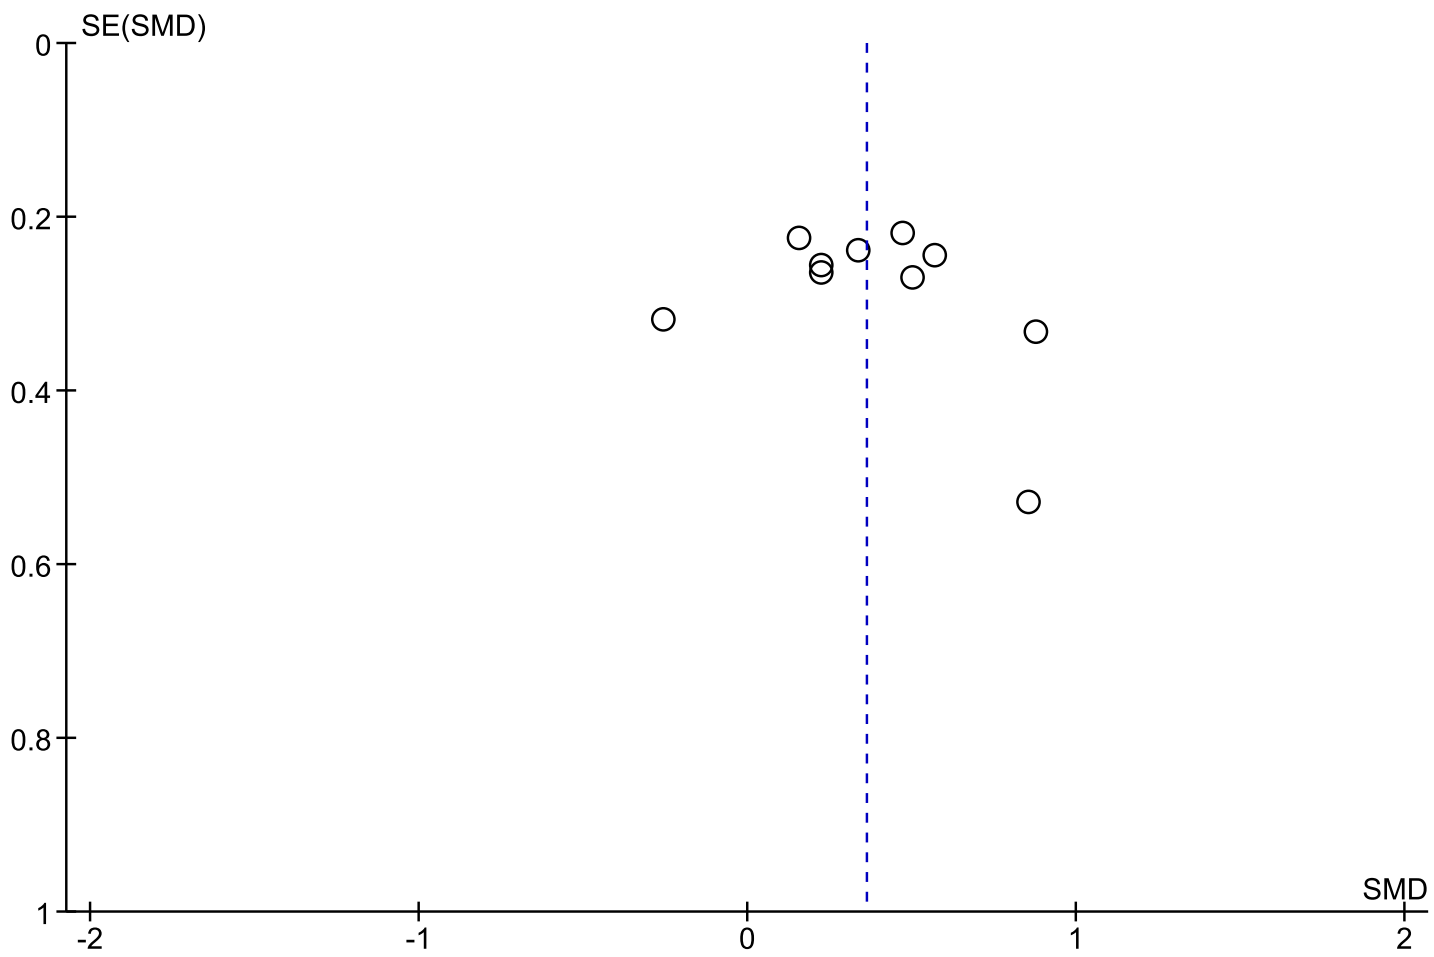

Supplement: 13018_2022_3461_MOESM18_ESM.pdf [file 13018_2022_3461_MOESM18_ESM.pdf]
