# Supplementary material for: Pain mechanisms in complex regional pain syndrome: a systematic review and meta-analysis of quantitative sensory testing outcomes
Source: PubMed Central journal article supplement (PMC9806919; doi:10.1186/s13018-022-03461-2), 2023-01-02

| Study or Subgroup     | CRPS  |       |            | Control |       |            | Weight        | Std. Mean Difference |                       | Year |
|-----------------------|-------|-------|------------|---------|-------|------------|---------------|----------------------|-----------------------|------|
|                       | Mean  | SD    | Total      | Mean    | SD    | Total      |               | IV, Random, 95% CI   | IV, Random, 95% CI    |      |
| Sieweke 1999          | 44.2  | 4.12  | 23         | 44      | 2     | 15         | 7.2%          | 0.06                 | [-0.59, 0.71]         | 1999 |
| Kemler 2000           | 40.3  | 24.18 | 33         | 46.5    | 13.71 | 50         | 11.2%         | -0.33                | [-0.77, 0.11]         | 2000 |
| Kemler 2000           | 41.6  | 19.39 | 20         | 46.7    | 12.45 | 50         | 9.4%          | -0.34                | [-0.86, 0.18]         | 2000 |
| Huge 2008             | 44.2  | 4.3   | 34         | 45.2    | 3     | 56         | 11.5%         | -0.28                | [-0.71, 0.15]         | 2008 |
| Munts 2011            | 42.3  | 10.5  | 44         | 44.6    | 3     | 35         | 11.1%         | -0.28                | [-0.73, 0.16]         | 2011 |
| Gierthmühlen 2012     | 41.4  | 4.7   | 298        | 44.7    | 2.7   | 32         | 13.1%         | -0.72                | [-1.09, -0.35]        | 2012 |
| Kolb 2012             | 41.4  | 7.15  | 20         | 43.8    | 3.8   | 20         | 7.5%          | -0.41                | [-1.04, 0.22]         | 2012 |
| Rooijen 2013          | 43.9  | 7.4   | 17         | 44      | 5.2   | 42         | 8.6%          | -0.02                | [-0.58, 0.55]         | 2013 |
| Rooijen 2013          | 41.77 | 9.64  | 31         | 44      | 5.2   | 42         | 10.6%         | -0.30                | [-0.76, 0.17]         | 2013 |
| Terkelsen 2014        | 38.4  | 4.1   | 20         | 44.3    | 3.3   | 20         | 6.3%          | -1.55                | [-2.27, -0.84]        | 2014 |
| Rasmussen 2018        | 35.6  | 3.8   | 8          | 38.4    | 2.8   | 8          | 3.6%          | -0.79                | [-1.82, 0.24]         | 2018 |
| <b>Total (95% CI)</b> |       |       | <b>548</b> |         |       | <b>370</b> | <b>100.0%</b> | <b>-0.41</b>         | <b>[-0.63, -0.20]</b> |      |

Heterogeneity: Tau<sup>2</sup> = 0.06; Chi<sup>2</sup> = 18.05, df = 10 (P = 0.05); I<sup>2</sup> = 45%

Test for overall effect: Z = 3.78 (P = 0.0002)

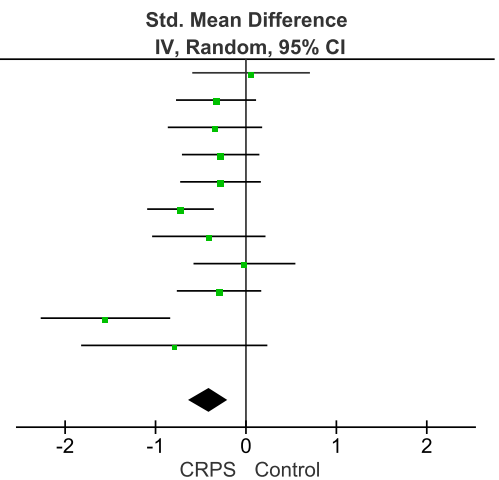

Supplement: 13018_2022_3461_MOESM19_ESM.pdf [file 13018_2022_3461_MOESM19_ESM.pdf]
