# Supplementary material for: Pain mechanisms in complex regional pain syndrome: a systematic review and meta-analysis of quantitative sensory testing outcomes
Source: PubMed Central journal article supplement (PMC9806919; doi:10.1186/s13018-022-03461-2), 2023-01-02

| Study or Subgroup     | CRPS  |     | Control    |       |       | Weight     | Std. Mean Difference |                             | Year |
|-----------------------|-------|-----|------------|-------|-------|------------|----------------------|-----------------------------|------|
|                       | Mean  | SD  | Total      | Mean  | SD    |            | Total                | IV, Random, 95% CI          |      |
| Seifert 2009          | 213.6 | 223 | 27         | 310.8 | 167.3 | 14         | 29.5%                | -0.46 [-1.12, 0.19]         | 2009 |
| Gierthmühlen 2012     | 1.68  | 0.5 | 296        | 1.78  | 0.35  | 32         | 30.0%                | -0.20 [-0.57, 0.16]         | 2012 |
| Wolanin 2012          | 3.2   | 0.3 | 32         | 10.5  | 0.13  | 35         | 10.9%                | -31.71 [-37.27, -26.16]     | 2012 |
| Kolb 2012             | 139   | 163 | 20         | 148   | 184.7 | 20         | 29.6%                | -0.05 [-0.67, 0.57]         | 2012 |
| <b>Total (95% CI)</b> |       |     | <b>375</b> |       |       | <b>101</b> | <b>100.0%</b>        | <b>-3.66 [-5.95, -1.37]</b> |      |

Heterogeneity: Tau<sup>2</sup> = 4.51; Chi<sup>2</sup> = 123.94, df = 3 (P < 0.00001); I<sup>2</sup> = 98%  
Test for overall effect: Z = 3.13 (P = 0.002)

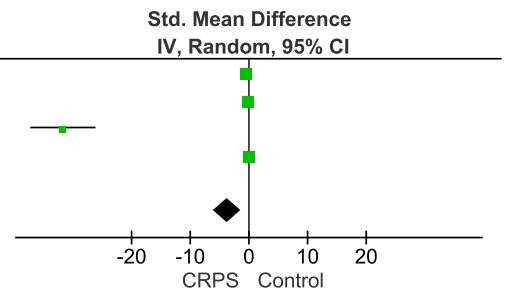

Supplement: 13018_2022_3461_MOESM23_ESM.pdf [file 13018_2022_3461_MOESM23_ESM.pdf]
