# Supplementary material for: Pain mechanisms in complex regional pain syndrome: a systematic review and meta-analysis of quantitative sensory testing outcomes
Source: PubMed Central journal article supplement (PMC9806919; doi:10.1186/s13018-022-03461-2), 2023-01-02

| Study or Subgroup     | CRPS  |       |           | Control |       |           | Weight        | Std. Mean Difference |                      | Year | Std. Mean Difference |        |
|-----------------------|-------|-------|-----------|---------|-------|-----------|---------------|----------------------|----------------------|------|----------------------|--------|
|                       | Mean  | SD    | Total     | Mean    | SD    | Total     |               | IV, Random, 95% CI   | 95% CI               |      | IV, Random, 95% CI   | 95% CI |
| Seifert 2009          | 278.1 | 247.7 | 27        | 310.8   | 167.3 | 14        | 48.2%         | -0.14                | [-0.79, 0.50]        | 2009 |                      |        |
| Kolb 2012             | 199.5 | 176   | 20        | 148     | 184.7 | 20        | 51.8%         | 0.28                 | [-0.34, 0.90]        | 2012 |                      |        |
| <b>Total (95% CI)</b> |       |       | <b>47</b> |         |       | <b>34</b> | <b>100.0%</b> | <b>0.08</b>          | <b>[-0.37, 0.52]</b> |      |                      |        |

Heterogeneity: Tau<sup>2</sup> = 0.00; Chi<sup>2</sup> = 0.85, df = 1 (P = 0.36); I<sup>2</sup> = 0%  
 Test for overall effect: Z = 0.33 (P = 0.74)

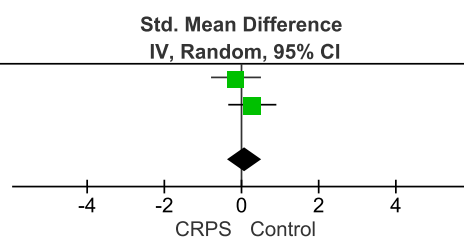

Supplement: 13018_2022_3461_MOESM24_ESM.pdf [file 13018_2022_3461_MOESM24_ESM.pdf]
