# Supplementary material for: Pain mechanisms in complex regional pain syndrome: a systematic review and meta-analysis of quantitative sensory testing outcomes
Source: PubMed Central journal article supplement (PMC9806919; doi:10.1186/s13018-022-03461-2), 2023-01-02

| Study or Subgroup     | CRPS  |       |           | Control |      |           | Weight        | Std. Mean Difference |                      | Year |
|-----------------------|-------|-------|-----------|---------|------|-----------|---------------|----------------------|----------------------|------|
|                       | Mean  | SD    | Total     | Mean    | SD   | Total     |               | IV, Random, 95% CI   | 95% CI               |      |
| Mainka 2014           | 279.4 | 148.8 | 18        | 255.3   | 55.9 | 18        | 33.7%         | 0.21                 | [-0.45, 0.86]        | 2014 |
| Terkelsen 2014        | 315   | 106   | 20        | 597     | 156  | 20        | 32.6%         | -2.07                | [-2.86, -1.29]       | 2014 |
| Mainka 2014           | 300.2 | 140.5 | 18        | 276.1   | 73.2 | 18        | 33.7%         | 0.21                 | [-0.44, 0.87]        | 2014 |
| <b>Total (95% CI)</b> |       |       | <b>56</b> |         |      | <b>56</b> | <b>100.0%</b> | <b>-0.54</b>         | <b>[-1.93, 0.86]</b> |      |

Heterogeneity: Tau<sup>2</sup> = 1.39; Chi<sup>2</sup> = 24.18, df = 2 (P < 0.00001); I<sup>2</sup> = 92%  
 Test for overall effect: Z = 0.75 (P = 0.45)

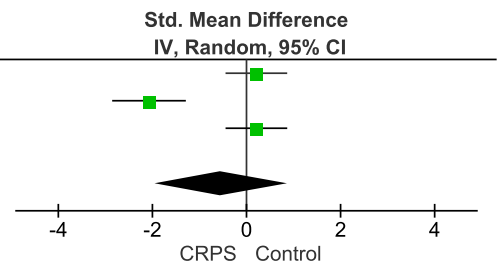

Supplement: 13018_2022_3461_MOESM30_ESM.pdf [file 13018_2022_3461_MOESM30_ESM.pdf]
