# Supplementary material for: Pain mechanisms in complex regional pain syndrome: a systematic review and meta-analysis of quantitative sensory testing outcomes
Source: PubMed Central journal article supplement (PMC9806919; doi:10.1186/s13018-022-03461-2), 2023-01-02

| Study or Subgroup     | CRPS |     |            | Control |     |            | Weight        | Std. Mean Difference |                     | Year |
|-----------------------|------|-----|------------|---------|-----|------------|---------------|----------------------|---------------------|------|
|                       | Mean | SD  | Total      | Mean    | SD  | Total      |               | IV, Random, 95% CI   | IV, Random, 95% CI  |      |
| Sieweke 1999          | 48.5 | 40  | 17         | 46.6    | 19  | 15         | 14.5%         | 0.06                 | [-0.64, 0.75]       | 1999 |
| Wolanin 2012          | 5.3  | 7.7 | 32         | 0.6     | 1.5 | 35         | 21.9%         | 0.86                 | [0.35, 1.36]        | 2012 |
| Kolb 2012             | 2.14 | 2.3 | 20         | 1.3     | 1.8 | 20         | 16.7%         | 0.40                 | [-0.23, 1.03]       | 2012 |
| Gierthmühlen 2012     | 0.2  | 0.6 | 297        | -0.07   | 0.4 | 32         | 29.6%         | 0.46                 | [0.09, 0.83]        | 2012 |
| Drummond 2021         | 4.1  | 4   | 30         | 0.6     | 0.9 | 20         | 17.3%         | 1.09                 | [0.48, 1.70]        | 2021 |
| <b>Total (95% CI)</b> |      |     | <b>396</b> |         |     | <b>122</b> | <b>100.0%</b> | <b>0.59</b>          | <b>[0.27, 0.90]</b> |      |

Heterogeneity: Tau<sup>2</sup> = 0.05; Chi<sup>2</sup> = 6.76, df = 4 (P = 0.15); I<sup>2</sup> = 41%  
Test for overall effect: Z = 3.67 (P = 0.0002)

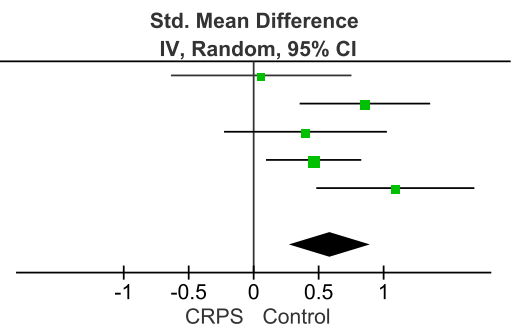

Supplement: 13018_2022_3461_MOESM31_ESM.pdf [file 13018_2022_3461_MOESM31_ESM.pdf]
