# Supplementary material for: Pain mechanisms in complex regional pain syndrome: a systematic review and meta-analysis of quantitative sensory testing outcomes
Source: PubMed Central journal article supplement (PMC9806919; doi:10.1186/s13018-022-03461-2), 2023-01-02

| Study or Subgroup     | CRPS |      |            | Control |      |            | Weight        | Std. Mean Difference |                      | Year |
|-----------------------|------|------|------------|---------|------|------------|---------------|----------------------|----------------------|------|
|                       | Mean | SD   | Total      | Mean    | SD   | Total      |               | IV, Random, 95% CI   | IV, Random, 95% CI   |      |
| Sieweke 1999          | 2.1  | 5.8  | 17         | 1.9     | 4.8  | 15         | 13.4%         | 0.04                 | [-0.66, 0.73]        | 1999 |
| Gierthmühlen 2012     | 0.4  | 0.35 | 257        | 0.32    | 0.24 | 32         | 20.5%         | 0.23                 | [-0.13, 0.60]        | 2012 |
| Kolb 2012             | 4    | 4.7  | 20         | 2       | 1    | 20         | 14.6%         | 0.58                 | [-0.06, 1.21]        | 2012 |
| Wolanin 2012          | 6    | 7.7  | 32         | 1.3     | 3    | 35         | 17.4%         | 0.81                 | [0.31, 1.31]         | 2012 |
| Rooijen 2013          | 1.9  | 1.9  | 17         | 2       | 1.5  | 42         | 16.0%         | -0.06                | [-0.62, 0.50]        | 2013 |
| Rooijen 2013          | 1.47 | 0.77 | 31         | 2       | 1.5  | 42         | 18.1%         | -0.42                | [-0.89, 0.05]        | 2013 |
| <b>Total (95% CI)</b> |      |      | <b>374</b> |         |      | <b>186</b> | <b>100.0%</b> | <b>0.19</b>          | <b>[-0.17, 0.56]</b> |      |

Heterogeneity: Tau<sup>2</sup> = 0.14; Chi<sup>2</sup> = 14.84, df = 5 (P = 0.01); I<sup>2</sup> = 66%

Test for overall effect: Z = 1.03 (P = 0.30)

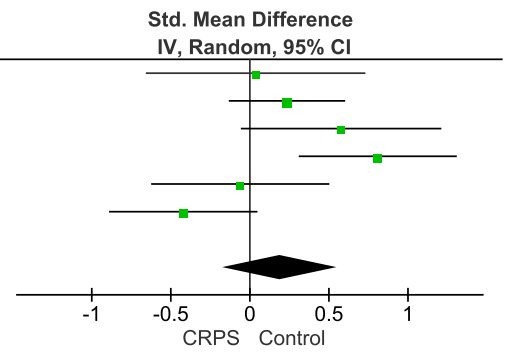

Supplement: 13018_2022_3461_MOESM33_ESM.pdf [file 13018_2022_3461_MOESM33_ESM.pdf]
