# Supplementary material for: Pain mechanisms in complex regional pain syndrome: a systematic review and meta-analysis of quantitative sensory testing outcomes
Source: PubMed Central journal article supplement (PMC9806919; doi:10.1186/s13018-022-03461-2), 2023-01-02

| Study or Subgroup     | CRPS |     |           | Control |     |           | Weight        | Std. Mean Difference |                      | Year |
|-----------------------|------|-----|-----------|---------|-----|-----------|---------------|----------------------|----------------------|------|
|                       | Mean | SD  | Total     | Mean    | SD  | Total     |               | IV, Random, 95% CI   | 95% CI               |      |
| Sieweke 1999          | 1.8  | 5.2 | 17        | 1.9     | 4.8 | 15        | 48.5%         | -0.02                | [-0.71, 0.67]        | 1999 |
| Kolb 2012             | 5.5  | 6.4 | 20        | 2       | 1   | 20        | 51.5%         | 0.75                 | [0.11, 1.39]         | 2012 |
| <b>Total (95% CI)</b> |      |     | <b>37</b> |         |     | <b>35</b> | <b>100.0%</b> | <b>0.38</b>          | <b>[-0.38, 1.13]</b> |      |

Heterogeneity: Tau<sup>2</sup> = 0.18; Chi<sup>2</sup> = 2.53, df = 1 (P = 0.11); I<sup>2</sup> = 60%  
 Test for overall effect: Z = 0.98 (P = 0.33)

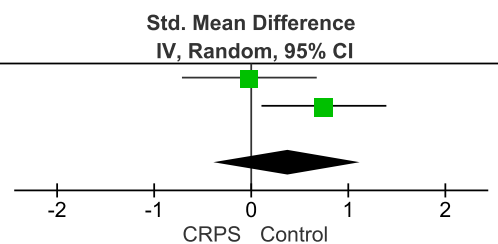

Supplement: 13018_2022_3461_MOESM34_ESM.pdf [file 13018_2022_3461_MOESM34_ESM.pdf]
