# Supplementary material for: Pain mechanisms in complex regional pain syndrome: a systematic review and meta-analysis of quantitative sensory testing outcomes
Source: PubMed Central journal article supplement (PMC9806919; doi:10.1186/s13018-022-03461-2), 2023-01-02

| Study or Subgroup     | CRPS |     |            | Control |     |           | Weight        | Std. Mean Difference |                     | Year |
|-----------------------|------|-----|------------|---------|-----|-----------|---------------|----------------------|---------------------|------|
|                       | Mean | SD  | Total      | Mean    | SD  | Total     |               | IV, Random, 95% CI   | IV, Random, 95% CI  |      |
| Vartiainen et 2008    | 7.5  | 0.7 | 8          | 4.1     | 0.5 | 9         | 5.9%          | 5.36                 | [3.10, 7.63]        | 2008 |
| Seifert 2009          | 4.2  | 2   | 27         | 2.8     | 1.4 | 14        | 20.9%         | 0.75                 | [0.09, 1.42]        | 2009 |
| Wolanin 2012          | 6    | 7.7 | 32         | 0.7     | 1.5 | 35        | 23.3%         | 0.97                 | [0.46, 1.47]        | 2012 |
| Terkelsen 2014        | 63   | 27  | 20         | 37      | 27  | 20        | 21.0%         | 0.94                 | [0.29, 1.60]        | 2014 |
| Rasmussen 2018        | 7    | 7.7 | 8          | 0       | 0.8 | 8         | 14.8%         | 1.21                 | [0.12, 2.30]        | 2018 |
| Rasmussen 2018        | 4.3  | 3.5 | 8          | 0.3     | 0.4 | 8         | 14.1%         | 1.52                 | [0.37, 2.67]        | 2018 |
| <b>Total (95% CI)</b> |      |     | <b>103</b> |         |     | <b>94</b> | <b>100.0%</b> | <b>1.29</b>          | <b>[0.67, 1.91]</b> |      |

Heterogeneity: Tau<sup>2</sup> = 0.36; Chi<sup>2</sup> = 15.59, df = 5 (P = 0.008); I<sup>2</sup> = 68%  
 Test for overall effect: Z = 4.08 (P < 0.0001)

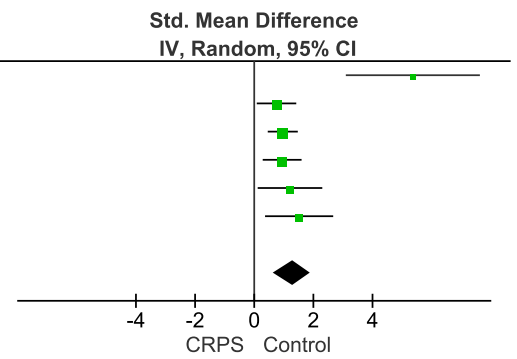

Supplement: 13018_2022_3461_MOESM35_ESM.pdf [file 13018_2022_3461_MOESM35_ESM.pdf]
