# Supplementary material for: Pain mechanisms in complex regional pain syndrome: a systematic review and meta-analysis of quantitative sensory testing outcomes
Source: PubMed Central journal article supplement (PMC9806919; doi:10.1186/s13018-022-03461-2), 2023-01-02

| Study or Subgroup     | CRPS |      |           | Control |     |           | Weight        | Std. Mean Difference |                     | Year |
|-----------------------|------|------|-----------|---------|-----|-----------|---------------|----------------------|---------------------|------|
|                       | Mean | SD   | Total     | Mean    | SD  | Total     |               | IV, Random, 95% CI   | IV, Random, 95% CI  |      |
| Vartiainen et 2008    | 5.4  | 1    | 8         | 4.1     | 0.3 | 9         | 10.2%         | 1.72                 | [0.56, 2.88]        | 2008 |
| Seifert 2009          | 3.92 | 1.92 | 27        | 2.8     | 1.4 | 14        | 31.4%         | 0.62                 | [-0.04, 1.28]       | 2009 |
| Terkelsen 2014        | 54   | 18   | 20        | 36      | 22  | 20        | 32.3%         | 0.88                 | [0.23, 1.53]        | 2014 |
| Rasmussen 2018        | 1.5  | 2.1  | 8         | 0       | 0.8 | 8         | 12.6%         | 0.89                 | [-0.15, 1.94]       | 2018 |
| Rasmussen 2018        | 1    | 1.4  | 8         | 0.3     | 0.4 | 8         | 13.4%         | 0.64                 | [-0.37, 1.66]       | 2018 |
| <b>Total (95% CI)</b> |      |      | <b>71</b> |         |     | <b>59</b> | <b>100.0%</b> | <b>0.85</b>          | <b>[0.48, 1.22]</b> |      |

Heterogeneity: Tau<sup>2</sup> = 0.00; Chi<sup>2</sup> = 2.79, df = 4 (P = 0.59); I<sup>2</sup> = 0%

Test for overall effect: Z = 4.52 (P < 0.00001)

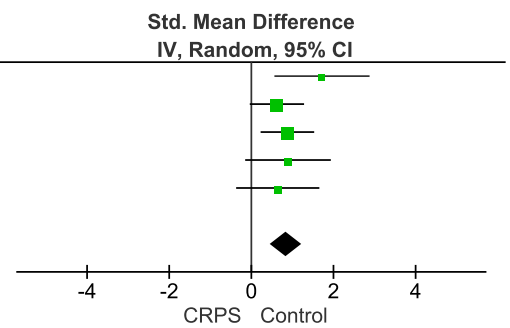

Supplement: 13018_2022_3461_MOESM36_ESM.pdf [file 13018_2022_3461_MOESM36_ESM.pdf]
