# Supplementary material for: Pain mechanisms in complex regional pain syndrome: a systematic review and meta-analysis of quantitative sensory testing outcomes
Source: PubMed Central journal article supplement (PMC9806919; doi:10.1186/s13018-022-03461-2), 2023-01-02

| Study or Subgroup     | CRPS |     |           | Control |      |           | Weight        | Std. Mean Difference |                     | Year |
|-----------------------|------|-----|-----------|---------|------|-----------|---------------|----------------------|---------------------|------|
|                       | Mean | SD  | Total     | Mean    | SD   | Total     |               | IV, Random, 95% CI   | IV, Random, 95% CI  |      |
| Seifert 2009          | 12.8 | 1.3 | 27        | 8       | 1.2  | 14        | 45.6%         | 3.71                 | [2.65, 4.78]        | 2009 |
| Wolanin 2012          | 5.8  | 3   | 20        | 0.01    | 0.04 | 20        | 54.4%         | 2.67                 | [1.80, 3.55]        | 2012 |
| <b>Total (95% CI)</b> |      |     | <b>47</b> |         |      | <b>34</b> | <b>100.0%</b> | <b>3.15</b>          | <b>[2.13, 4.16]</b> |      |

Heterogeneity: Tau<sup>2</sup> = 0.29; Chi<sup>2</sup> = 2.18, df = 1 (P = 0.14); I<sup>2</sup> = 54%  
 Test for overall effect: Z = 6.09 (P < 0.00001)

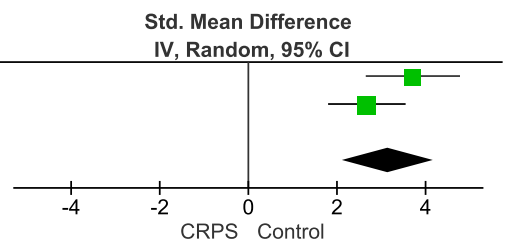

Supplement: 13018_2022_3461_MOESM37_ESM.pdf [file 13018_2022_3461_MOESM37_ESM.pdf]
