# Supplementary material for: Pain mechanisms in complex regional pain syndrome: a systematic review and meta-analysis of quantitative sensory testing outcomes
Source: PubMed Central journal article supplement (PMC9806919; doi:10.1186/s13018-022-03461-2), 2023-01-02

| Study or Subgroup     | CRPS |      |           | Control |      |           | Weight        | Std. Mean Difference |                       | Year | Std. Mean Difference |         |
|-----------------------|------|------|-----------|---------|------|-----------|---------------|----------------------|-----------------------|------|----------------------|---------|
|                       | Mean | SD   | Total     | Mean    | SD   | Total     |               | IV, Random, 95% CI   | IV, Random, 95% CI    |      | CRPS                 | Control |
| Gossrau 2021          | 1.94 | 1.45 | 19        | 3.7     | 2    | 22        | 66.3%         | -0.98                | [-1.63, -0.32]        | 2021 |                      |         |
| Habig 2021            | 1.85 | 2.2  | 10        | 3.4     | 0.37 | 11        | 33.7%         | -0.97                | [-1.88, -0.05]        | 2021 |                      |         |
| <b>Total (95% CI)</b> |      |      | <b>29</b> |         |      | <b>33</b> | <b>100.0%</b> | <b>-0.97</b>         | <b>[-1.51, -0.44]</b> |      |                      |         |

Heterogeneity: Tau<sup>2</sup> = 0.00; Chi<sup>2</sup> = 0.00, df = 1 (P = 0.99); I<sup>2</sup> = 0%  
 Test for overall effect: Z = 3.59 (P = 0.0003)

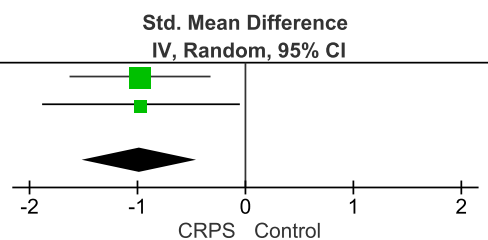

Supplement: 13018_2022_3461_MOESM38_ESM.pdf [file 13018_2022_3461_MOESM38_ESM.pdf]
