# Supplementary material for: Pain mechanisms in complex regional pain syndrome: a systematic review and meta-analysis of quantitative sensory testing outcomes
Source: PubMed Central journal article supplement (PMC9806919; doi:10.1186/s13018-022-03461-2), 2023-01-02

| Study or Subgroup     | CRPS |      |           | Control |      |           | Weight        | Std. Mean Difference |                      | Year |
|-----------------------|------|------|-----------|---------|------|-----------|---------------|----------------------|----------------------|------|
|                       | Mean | SD   | Total     | Mean    | SD   | Total     |               | IV, Random, 95% CI   | 95% CI               |      |
| Gossrau 2021          | 1.96 | 1.53 | 19        | 3.7     | 2    | 22        | 54.5%         | -0.95                | [-1.60, -0.30]       | 2021 |
| Habig 2021            | 3.4  | 0.13 | 10        | 3.4     | 0.37 | 11        | 45.5%         | 0.00                 | [-0.86, 0.86]        | 2021 |
| <b>Total (95% CI)</b> |      |      | <b>29</b> |         |      | <b>33</b> | <b>100.0%</b> | <b>-0.52</b>         | <b>[-1.44, 0.41]</b> |      |

Heterogeneity: Tau<sup>2</sup> = 0.30; Chi<sup>2</sup> = 2.99, df = 1 (P = 0.08); I<sup>2</sup> = 67%  
 Test for overall effect: Z = 1.09 (P = 0.27)

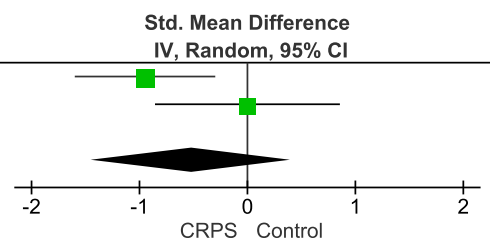

Supplement: 13018_2022_3461_MOESM39_ESM.pdf [file 13018_2022_3461_MOESM39_ESM.pdf]
