# Supplementary material for: Pain mechanisms in complex regional pain syndrome: a systematic review and meta-analysis of quantitative sensory testing outcomes
Source: PubMed Central journal article supplement (PMC9806919; doi:10.1186/s13018-022-03461-2), 2023-01-02

| Study or Subgroup     | CRPS |     |           | Control |      |            | Weight        | Std. Mean Difference |                       | Year | Std. Mean Difference<br>IV, Random, 95% CI |
|-----------------------|------|-----|-----------|---------|------|------------|---------------|----------------------|-----------------------|------|--------------------------------------------|
|                       | Mean | SD  | Total     | Mean    | SD   | Total      |               | IV, Random, 95% CI   | Year                  |      |                                            |
| Sethna 2007           | 29.3 | 2   | 42        | 30      | 1.2  | 101        | 51.8%         | -0.47                | [-0.84, -0.11]        | 2007 |                                            |
| Truffyn 2021          | 28.5 | 2.9 | 34        | 30.9    | 0.82 | 56         | 48.2%         | -1.26                | [-1.72, -0.79]        | 2021 |                                            |
| <b>Total (95% CI)</b> |      |     | <b>76</b> |         |      | <b>157</b> | <b>100.0%</b> | <b>-0.85</b>         | <b>[-1.62, -0.08]</b> |      |                                            |

Heterogeneity: Tau<sup>2</sup> = 0.26; Chi<sup>2</sup> = 6.82, df = 1 (P = 0.009); I<sup>2</sup> = 85%

Test for overall effect: Z = 2.16 (P = 0.03)

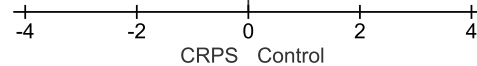

Supplement: 13018_2022_3461_MOESM40_ESM.pdf [file 13018_2022_3461_MOESM40_ESM.pdf]
