# Supplementary material for: Pain mechanisms in complex regional pain syndrome: a systematic review and meta-analysis of quantitative sensory testing outcomes
Source: PubMed Central journal article supplement (PMC9806919; doi:10.1186/s13018-022-03461-2), 2023-01-02

| Study or Subgroup     | CRPS |      | Control   |      |      | Weight     | Std. Mean Difference |                            | Year |
|-----------------------|------|------|-----------|------|------|------------|----------------------|----------------------------|------|
|                       | Mean | SD   | Total     | Mean | SD   |            | Total                | IV, Random, 95% CI         |      |
| Sethna 2007           | 30.3 | 1.1  | 42        | 30   | 1.2  | 101        | 50.5%                | 0.25 [-0.11, 0.62]         | 2007 |
| Truffyn 2021          | 29.1 | 2.12 | 34        | 30.9 | 0.82 | 56         | 49.5%                | -1.23 [-1.69, -0.77]       | 2021 |
| <b>Total (95% CI)</b> |      |      | <b>76</b> |      |      | <b>157</b> | <b>100.0%</b>        | <b>-0.48 [-1.93, 0.97]</b> |      |

Heterogeneity: Tau<sup>2</sup> = 1.06; Chi<sup>2</sup> = 24.49, df = 1 (P < 0.00001); I<sup>2</sup> = 96%  
 Test for overall effect: Z = 0.65 (P = 0.52)

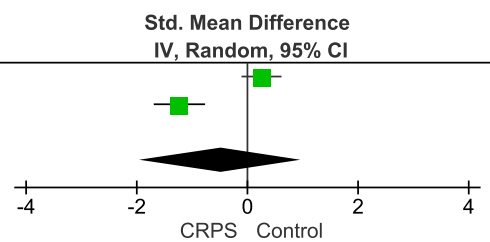

Supplement: 13018_2022_3461_MOESM41_ESM.pdf [file 13018_2022_3461_MOESM41_ESM.pdf]
