# Supplementary material for: Pain mechanisms in complex regional pain syndrome: a systematic review and meta-analysis of quantitative sensory testing outcomes
Source: PubMed Central journal article supplement (PMC9806919; doi:10.1186/s13018-022-03461-2), 2023-01-02

| Study or Subgroup     | CRPS |     |           | Control |      |            | Weight        | Std. Mean Difference |                      | Year | Std. Mean Difference |  |
|-----------------------|------|-----|-----------|---------|------|------------|---------------|----------------------|----------------------|------|----------------------|--|
|                       | Mean | SD  | Total     | Mean    | SD   | Total      |               | IV, Random, 95% CI   | Year                 |      | IV, Random, 95% CI   |  |
| Sethna 2007           | 35.4 | 1.6 | 42        | 35.3    | 1.2  | 101        | 50.6%         | 0.07                 | [-0.29, 0.43]        | 2007 |                      |  |
| Truffyn 2021          | 37.5 | 3.6 | 34        | 33.76   | 1.02 | 56         | 49.4%         | 1.58                 | [1.09, 2.07]         | 2021 |                      |  |
| <b>Total (95% CI)</b> |      |     | <b>76</b> |         |      | <b>157</b> | <b>100.0%</b> | <b>0.82</b>          | <b>[-0.66, 2.29]</b> |      |                      |  |

Heterogeneity: Tau<sup>2</sup> = 1.08; Chi<sup>2</sup> = 23.71, df = 1 (P < 0.00001); I<sup>2</sup> = 96%  
 Test for overall effect: Z = 1.09 (P = 0.28)

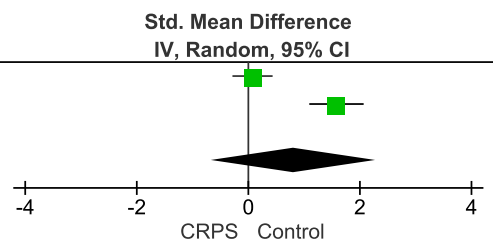

Supplement: 13018_2022_3461_MOESM42_ESM.pdf [file 13018_2022_3461_MOESM42_ESM.pdf]
