# Supplementary material for: Pain mechanisms in complex regional pain syndrome: a systematic review and meta-analysis of quantitative sensory testing outcomes
Source: PubMed Central journal article supplement (PMC9806919; doi:10.1186/s13018-022-03461-2), 2023-01-02

| Study or Subgroup     | CRPS |     |           | Control |      |            | Weight        | Std. Mean Difference |                      | Year | Std. Mean Difference |      |
|-----------------------|------|-----|-----------|---------|------|------------|---------------|----------------------|----------------------|------|----------------------|------|
|                       | Mean | SD  | Total     | Mean    | SD   | Total      |               | IV, Random, 95% CI   | Year                 |      | IV, Random, 95% CI   | Year |
| Sethna 2007           | 35   | 1.3 | 42        | 35.3    | 1.2  | 101        | 50.4%         | -0.24                | [-0.60, 0.12]        | 2007 |                      |      |
| Truffyn 2021          | 36.5 | 2.8 | 34        | 33.76   | 1.02 | 56         | 49.6%         | 1.43                 | [0.96, 1.91]         | 2021 |                      |      |
| <b>Total (95% CI)</b> |      |     | <b>76</b> |         |      | <b>157</b> | <b>100.0%</b> | <b>0.59</b>          | <b>[-1.05, 2.23]</b> |      |                      |      |

Heterogeneity: Tau<sup>2</sup> = 1.36; Chi<sup>2</sup> = 30.17, df = 1 (P < 0.00001); I<sup>2</sup> = 97%  
 Test for overall effect: Z = 0.70 (P = 0.48)

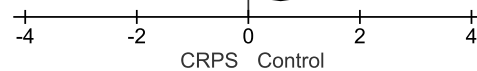

Supplement: 13018_2022_3461_MOESM43_ESM.pdf [file 13018_2022_3461_MOESM43_ESM.pdf]
