# Supplementary material for: Pain mechanisms in complex regional pain syndrome: a systematic review and meta-analysis of quantitative sensory testing outcomes
Source: PubMed Central journal article supplement (PMC9806919; doi:10.1186/s13018-022-03461-2), 2023-01-02

| Study or Subgroup     | CRPS  |      |            | Control |      |            | Weight        | Std. Mean Difference |                     | Year |
|-----------------------|-------|------|------------|---------|------|------------|---------------|----------------------|---------------------|------|
|                       | Mean  | SD   | Total      | Mean    | SD   | Total      |               | IV, Random, 95% CI   | IV, Random, 95% CI  |      |
| Sethna 2007           | 25.53 | 6.2  | 42         | 19.4    | 9.32 | 101        | 35.7%         | 0.71                 | [0.35, 1.08]        | 2007 |
| Becerra 2014          | 21.2  | 3.2  | 26         | 11.2    | 2.6  | 12         | 28.9%         | 3.23                 | [2.20, 4.26]        | 2014 |
| Truffyn 2021          | 18.9  | 10.3 | 34         | 17.8    | 10.3 | 56         | 35.3%         | 0.11                 | [-0.32, 0.53]       | 2021 |
| <b>Total (95% CI)</b> |       |      | <b>102</b> |         |      | <b>169</b> | <b>100.0%</b> | <b>1.23</b>          | <b>[0.05, 2.41]</b> |      |

Heterogeneity: Tau<sup>2</sup> = 0.98; Chi<sup>2</sup> = 30.60, df = 2 (P < 0.00001); I<sup>2</sup> = 93%  
Test for overall effect: Z = 2.04 (P = 0.04)

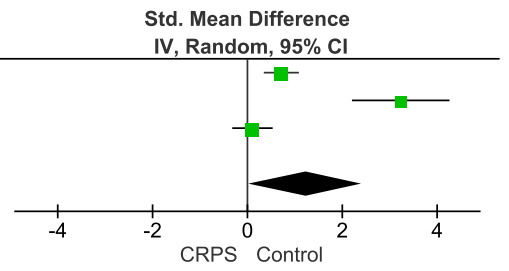

Supplement: 13018_2022_3461_MOESM44_ESM.pdf [file 13018_2022_3461_MOESM44_ESM.pdf]
