# Supplementary material for: Pain mechanisms in complex regional pain syndrome: a systematic review and meta-analysis of quantitative sensory testing outcomes
Source: PubMed Central journal article supplement (PMC9806919; doi:10.1186/s13018-022-03461-2), 2023-01-02

| Study or Subgroup     | CRPS |      |           | Control |      |            | Weight        | Std. Mean Difference |                      | Year |
|-----------------------|------|------|-----------|---------|------|------------|---------------|----------------------|----------------------|------|
|                       | Mean | SD   | Total     | Mean    | SD   | Total      |               | IV, Random, 95% CI   | 95% CI               |      |
| Sethna 2007           | 18.2 | 9.2  | 42        | 19.4    | 9.32 | 101        | 58.3%         | -0.13                | [-0.49, 0.23]        | 2007 |
| Truffyn 2021          | 18.2 | 10.2 | 34        | 17.8    | 10.3 | 56         | 41.7%         | 0.04                 | [-0.39, 0.46]        | 2021 |
| <b>Total (95% CI)</b> |      |      | <b>76</b> |         |      | <b>157</b> | <b>100.0%</b> | <b>-0.06</b>         | <b>[-0.33, 0.22]</b> |      |

Heterogeneity: Tau<sup>2</sup> = 0.00; Chi<sup>2</sup> = 0.34, df = 1 (P = 0.56); I<sup>2</sup> = 0%  
 Test for overall effect: Z = 0.42 (P = 0.67)

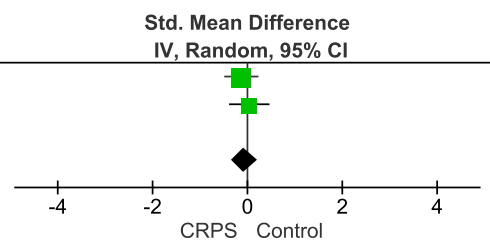

Supplement: 13018_2022_3461_MOESM45_ESM.pdf [file 13018_2022_3461_MOESM45_ESM.pdf]
