# Supplementary material for: Pain mechanisms in complex regional pain syndrome: a systematic review and meta-analysis of quantitative sensory testing outcomes
Source: PubMed Central journal article supplement (PMC9806919; doi:10.1186/s13018-022-03461-2), 2023-01-02

| Study or Subgroup     | CRPS |     |            | Control |      |            | Weight        | Std. Mean Difference |                      | Year | Std. Mean Difference |        |
|-----------------------|------|-----|------------|---------|------|------------|---------------|----------------------|----------------------|------|----------------------|--------|
|                       | Mean | SD  | Total      | Mean    | SD   | Total      |               | IV, Random, 95% CI   | 95% CI               |      | IV, Random, 95% CI   | 95% CI |
| Sethna 2007           | 39.4 | 3.2 | 42         | 42.6    | 3.15 | 101        | 34.6%         | -1.01                | [-1.38, -0.63]       | 2007 |                      |        |
| Becerra 2014          | 41.7 | 1.2 | 26         | 40.5    | 3.2  | 12         | 31.2%         | 0.58                 | [-0.12, 1.28]        | 2014 |                      |        |
| Truffyn 2021          | 41.3 | 4.1 | 34         | 39.9    | 4    | 56         | 34.2%         | 0.34                 | [-0.09, 0.77]        | 2021 |                      |        |
| <b>Total (95% CI)</b> |      |     | <b>102</b> |         |      | <b>169</b> | <b>100.0%</b> | <b>-0.05</b>         | <b>[-1.09, 0.99]</b> |      |                      |        |

Heterogeneity: Tau<sup>2</sup> = 0.77; Chi<sup>2</sup> = 28.03, df = 2 (P < 0.00001); I<sup>2</sup> = 93%  
 Test for overall effect: Z = 0.10 (P = 0.92)

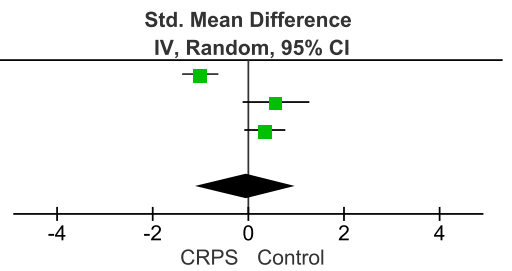

Supplement: 13018_2022_3461_MOESM46_ESM.pdf [file 13018_2022_3461_MOESM46_ESM.pdf]
