# Supplementary material for: Pain mechanisms in complex regional pain syndrome: a systematic review and meta-analysis of quantitative sensory testing outcomes
Source: PubMed Central journal article supplement (PMC9806919; doi:10.1186/s13018-022-03461-2), 2023-01-02

| Study or Subgroup     | CRPS |     |           | Control |     |            | Weight        | Std. Mean Difference |                      | Year | Std. Mean Difference |                      |
|-----------------------|------|-----|-----------|---------|-----|------------|---------------|----------------------|----------------------|------|----------------------|----------------------|
|                       | Mean | SD  | Total     | Mean    | SD  | Total      |               | IV, Random, 95% CI   | 95% CI               |      | IV, Random, 95% CI   | 95% CI               |
| Sethna 2007           | 40.9 | 3.3 | 42        | 42.6    | 3.2 | 101        | 50.3%         | -0.52                | [-0.89, -0.16]       | 2007 | -0.52                | [-0.89, -0.16]       |
| Truffyn 2021          | 41.3 | 3.7 | 34        | 33.95   | 4   | 56         | 49.7%         | 1.87                 | [1.36, 2.38]         | 2021 | 1.87                 | [1.36, 2.38]         |
| <b>Total (95% CI)</b> |      |     | <b>76</b> |         |     | <b>157</b> | <b>100.0%</b> | <b>0.67</b>          | <b>[-1.68, 3.02]</b> |      | <b>0.67</b>          | <b>[-1.68, 3.02]</b> |

Heterogeneity: Tau<sup>2</sup> = 2.82; Chi<sup>2</sup> = 56.13, df = 1 (P < 0.00001); I<sup>2</sup> = 98%  
 Test for overall effect: Z = 0.56 (P = 0.58)

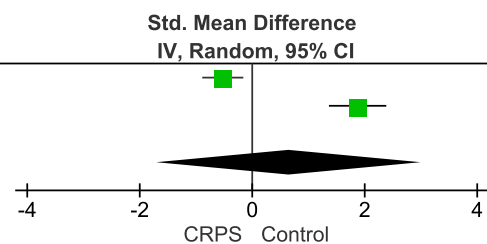

Supplement: 13018_2022_3461_MOESM47_ESM.pdf [file 13018_2022_3461_MOESM47_ESM.pdf]
